# Supplementary material
Source: Springer Nature journal article supplement (https://www.springermedizin.de/resource/supplementary/12874_2012_880_MOESM7_ESM.pdf/9432782)

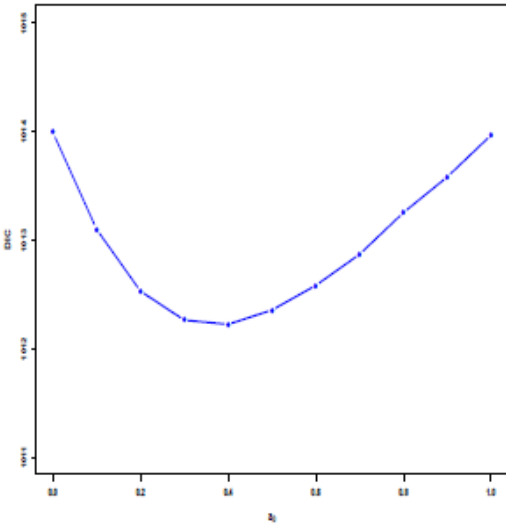

(a) DIC (RFS)

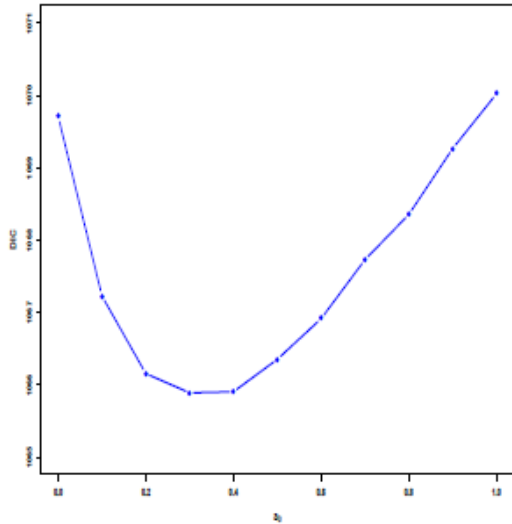

(b) DIC (OS)

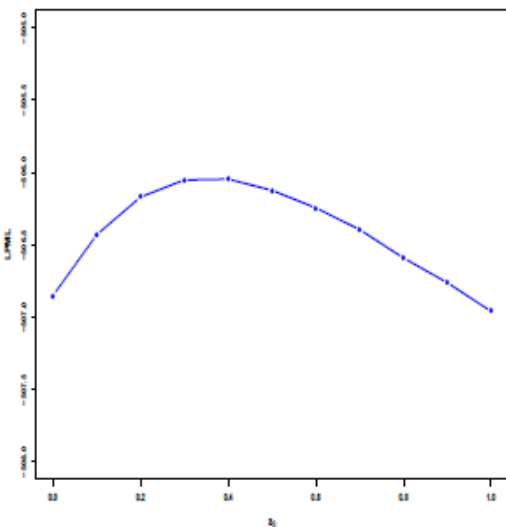

(c) LPML (RFS)

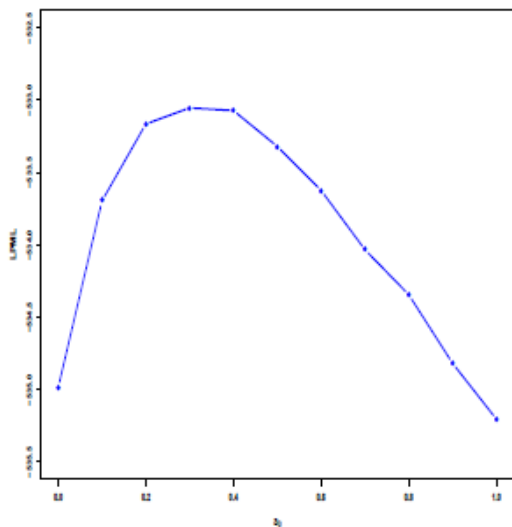

(d) LPML (OS)

Supplement: MOESM7 [file 9432782]
